# Supplementary material for: Volta Phase Plate Cryo-EM Structure of the Human Heterodimeric Amino Acid Transporter 4F2hc-LAT2
Source: PubMed Central journal article supplement (PMC6413005; doi:10.3390/ijms20040931), 2019-02-21
Supplement: ijms-20-00931-s001.pdf [file ijms-20-00931-s001.pdf]

**Table S1.** Data collection and processing

|                                                                  |                                             |
|------------------------------------------------------------------|---------------------------------------------|
| Electron microscope                                              | 200 kV FEI Tecnai F20                       |
| Detector                                                         | Falcon III                                  |
| Volta phase plate used                                           | Yes                                         |
| Magnification                                                    | 100,000x                                    |
| Pixel size (Å/pixel)                                             | 1.052                                       |
| Electron dose (e <sup>-</sup> / Å <sup>2</sup> / frame)          | 1.9                                         |
| Frames (No.)                                                     | 39                                          |
| Total electron dose per movie (e <sup>-</sup> / Å <sup>2</sup> ) | 74                                          |
| Defocus range (μm)                                               | -0.6 to -1.2                                |
| Symmetry imposed                                                 | C1                                          |
| Initial particle images (No.)                                    | 235,830                                     |
| Final particle images (No.)                                      | 47,933                                      |
| 3D Map resolution (FSC threshold)                                | 14.3 Å (0.5); 12.9 Å (0.143, Gold standard) |
